# Supplementary material for: Band gap engineered zinc oxide nanostructures via a sol–gel synthesis of solvent driven shape-controlled crystal growth
Source: PubMed Central journal article supplement (PMC9064155; doi:10.1039/c9ra02091h), 2019-05-10
Supplement: RA-009-C9RA02091H-s001.pdf [file RA-009-C9RA02091H-s001.pdf]

## Band Gap Engineered Zinc Oxide Nanostructures via a Sol-Gel Synthesis of Solvent Driven Shape-Controlled Crystal Growth

Klinton Davis,<sup>a</sup> Ryan Yarbrough,<sup>a</sup> Michael Froeschle,<sup>a</sup> Jamel White,<sup>a</sup> and Hemali Rathnayake<sup>a\*</sup>

<sup>a</sup>Department of Nanoscience, The Joint School of Nanoscience and Nanoengineering, University of North Carolina at Greensboro, Greensboro, NC 27401

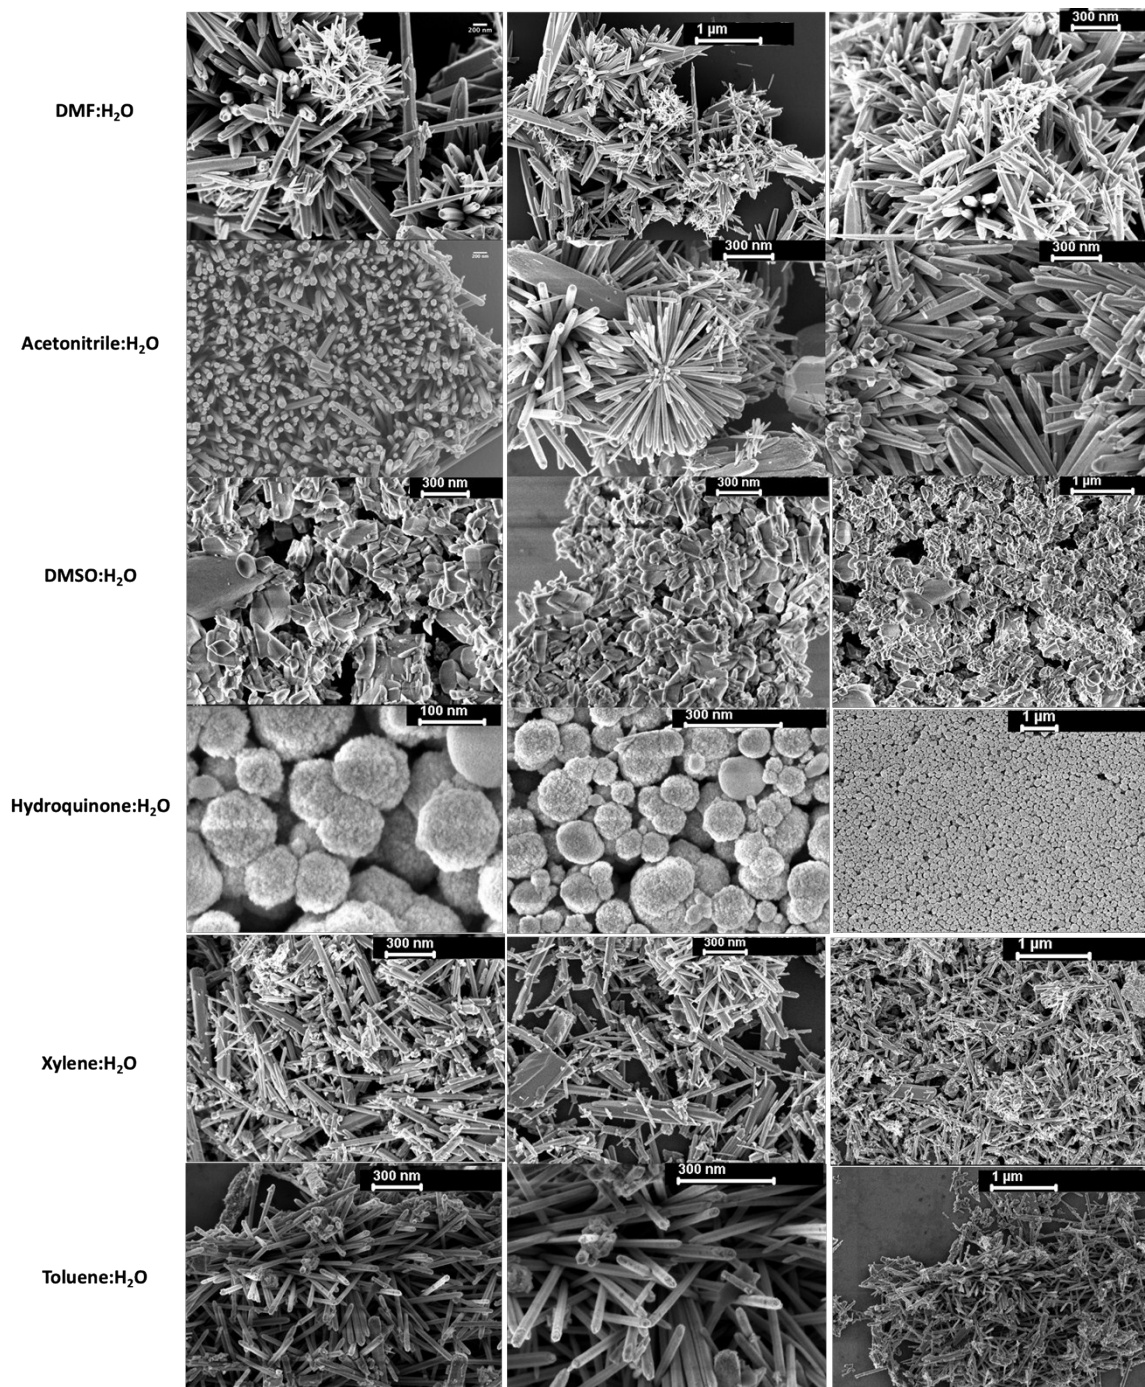

**Figure S1:** SEM images of ZnO nanostructures formed from each different solvent system.

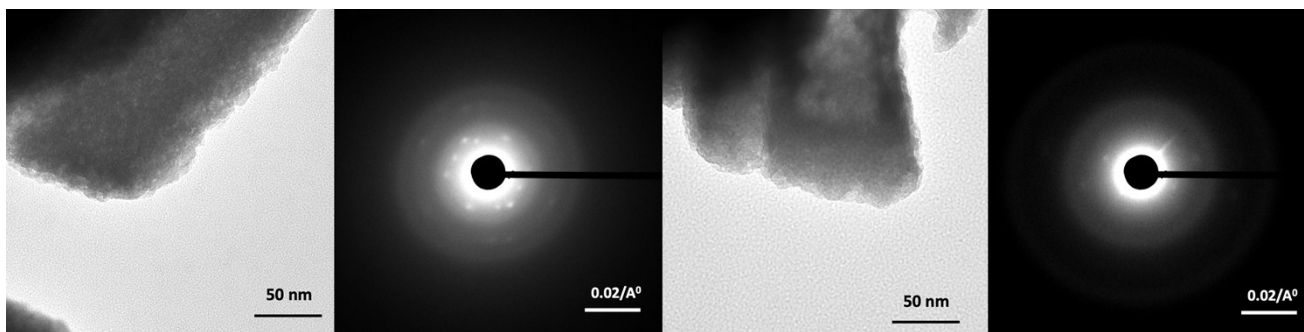

**Figure S2:** TEM images and SAED patterns of ZnO nanoslates formed in DMSO:water solvent system.

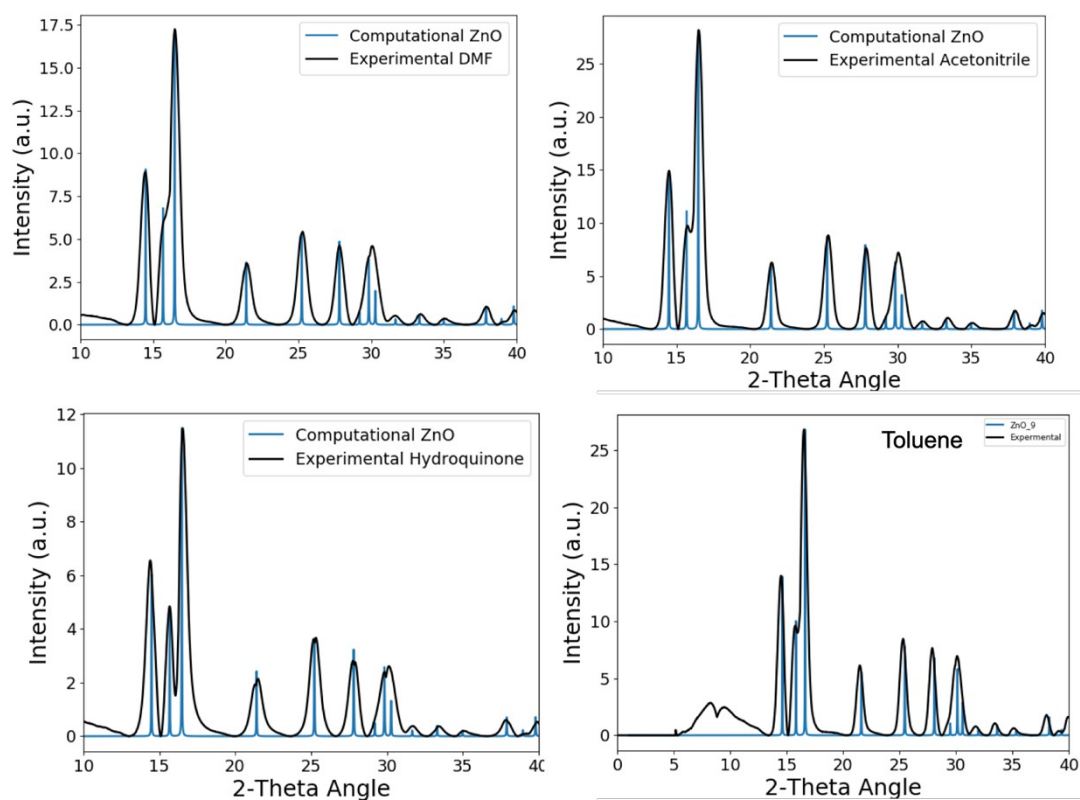

**Figure S3:** Experimental XRD traces and simulated XRD spectra of ZnO nanostructures with respect to the solvent type.

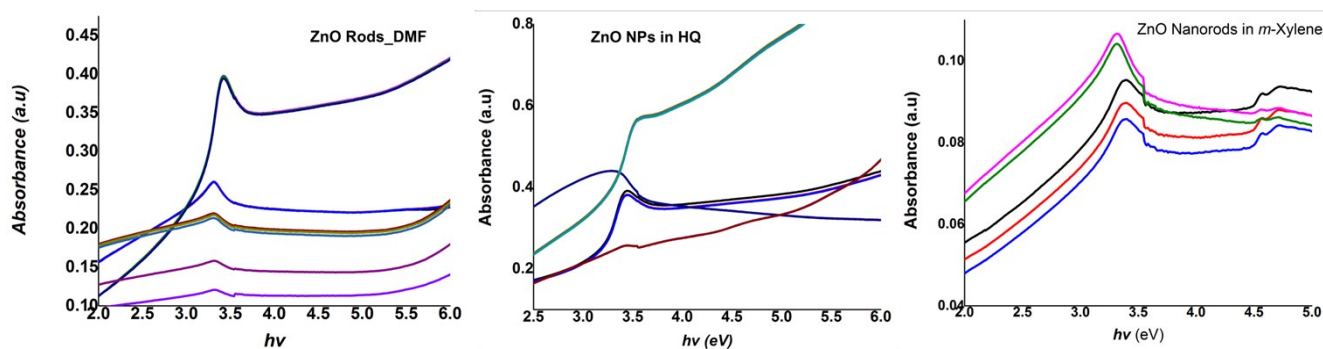

**Figure S4:** UV-vis spectral traces, collected from multiple sample trials of ZnO nanostructures-casted on thin films.

Table S1: XPS analysis of ZnO nanostructures for sol, nanorods, and nanoparticle morphologies.

| Morphology             | Peak                                        | Position BE (eV) $\pm$ 0.10 eV | FWHM (eV) $\pm$ 0.20 eV | Atomic Con. (%) |
|------------------------|---------------------------------------------|--------------------------------|-------------------------|-----------------|
| ZnO sol (nanocrystals) | Zn 2p <sub>1/2</sub> ; Zn 2p <sub>3/2</sub> | 1043.4; 1020.3                 | 1.44                    | 51.51           |
|                        | O 1s                                        | 529.1; 530.5                   | 1.18                    | 47.85           |
|                        | C 1s                                        | 283.8; 288.4                   | 1.27                    | 1.26            |
| ZnO NRs (m-Xylene)     | Zn 2p <sub>1/2</sub> ; Zn 2p <sub>3/2</sub> | 1045.9; 1022.7                 | 4.76                    | 35.13           |
|                        | O 1s                                        | 531.1                          | 4.31                    | 50.72           |
|                        | C 1s                                        | 284.4; 289.8                   | 3.93                    | 4.80            |
| ZnO NPs (Hydroquinone) | Zn 2p <sub>1/2</sub> ; Zn 2p <sub>3/2</sub> | 1045.9; 1022.7                 | 4.62                    | 26.88           |
|                        | O 1s                                        | 531.6                          | 4.41                    | 45.21           |
|                        | C 1s                                        | 284.8; 288.9                   | 5.65                    | 27.90           |
